# Supplementary material for: Therapeutic Effects of microRNAs on Nonalcoholic Fatty Liver Disease (NAFLD) and Nonalcoholic Steatohepatitis (NASH): A Systematic Review and Meta-Analysis
Source: MDPI journal article supplement (doi:10.3390/ijms24119168), 2023-05-23
Supplement: s1 [file s1]

Table S2.Models and treatment results are included in this systematic review

| Ref.                          | Country/Region        | Animal/Gender                  | Intervention    | Biological processes                         |
|-------------------------------|-----------------------|--------------------------------|-----------------|----------------------------------------------|
| miRNA-inhibition therapy      |                       |                                |                 |                                              |
| Alshehri 2021 <sup>[26]</sup> | Saudi Arabia/Asia     | rats/male                      | NAFLD induction | Fat accumulation                             |
| Bala 2021 <sup>[79]</sup>     | America/North America | C57BL/6、miR-155 KO mice/male   | NAFLD induction | Fat accumulation、Fibrosis                    |
| Chen 2020 <sup>[76]</sup>     | China/Asia            |                                |                 | Fat accumulation                             |
| Chen 2018 <sup>[82]</sup>     | China/Asia            | C57BL/6 mice/male              | Post NAFLD      | Fat accumulation                             |
| Cheng 2016 <sup>[84]</sup>    | China/Asia            |                                |                 | Oxidative stress                             |
| Chu 2022 <sup>[67]</sup>      | China/Asia            | C57BL/6J mice/male             | Post NAFLD      | Fat accumulation、Inflammation、Fibrosis       |
| Csak 2015 <sup>[80]</sup>     | America/North America | C57BL/6、miR-155 KO mice/female | NASH induction  | Fat accumulation、Fibrosis                    |
| Dai 2019 <sup>[43]</sup>      | China/Asia            | rats/male                      | Post NAFLD      | Oxidative stress、Fibrosis、Insulin resistance |
| Ding 2015 <sup>[27]</sup>     | China/Asia            | C57BL/6 mice/male              | Post NAFLD      | Fat accumulation                             |
| Ding 2022 <sup>[68]</sup>     | China/Asia            | C57BL/6 mice/male              | Post NAFLD      | Fat accumulation                             |
| Hanin 2018 <sup>[87]</sup>    | Israel/Asia           | C57BL/6J mice/male             | Post NASH       | Fat accumulation                             |

|                                |                      |                                      |                 |                                                                |
|--------------------------------|----------------------|--------------------------------------|-----------------|----------------------------------------------------------------|
| Hu 2022 <sup>[71]</sup>        | China/Asia           | C57BL/6J mice/male                   | Post NAFLD      | Oxidative stress、 Inflammation                                 |
| Lee A 2021 <sup>[28]</sup>     | China/Asia           |                                      |                 | Fat accumulation                                               |
| Lee D 2021 <sup>[90]</sup>     | South Korea/Asia     | C57BL/6J mice/male                   | Post NAFLD      | Fat accumulation                                               |
| Lee Y 2021 <sup>[19]</sup>     | South Korea/Asia     | C57BL/6J mice/male                   | NAFLD induction | Insulin resistance                                             |
| Lei 2018 <sup>[91]</sup>       | China/Asia           |                                      |                 | Fat accumulation                                               |
| Liu 2020 <sup>[23]</sup>       | China/Asia           | C57BL/6 mice/male                    | Post NAFLD      | Fat accumulation、 Insulin resistance                           |
| Liu 2020 <sup>[50]</sup>       | China/Asia           | C57BL/6J、 db/db mice/male            | NAFLD induction | Fat accumulation、 Insulin resistance                           |
| Long 2019 <sup>[72]</sup>      | China/Asia           |                                      |                 | Fat accumulation                                               |
| Ng 2014 <sup>[97]</sup>        | Singapore/Asia       | C57BL/6mice/male                     | Post NAFLD      | Fat accumulation                                               |
| Nie 2017 <sup>[98]</sup>       | China/Asia           | C57BL/6J mice/male                   | Post NAFLD      | Fat accumulation、 Inflammation                                 |
| Riaz 2021 <sup>[51]</sup>      | China/Asia           | C57BL/6J、 E3 rasts mice/male         | NAFLD induction | Inflammation、 Fibrosis                                         |
| Rodrigues 2017 <sup>[64]</sup> | Portugal/Europe      | C57BL/6、 miR-21 KO mice/male、 female | NASH induction  | Fat accumulation 、 Inflammation 、 Fibrosis 、 Other (Apoptosis) |
| Simino 2021 <sup>[33]</sup>    | Brazil/South America |                                      |                 | Fat accumulation                                               |

|                              |                       |                               |                 |                                                             |
|------------------------------|-----------------------|-------------------------------|-----------------|-------------------------------------------------------------|
| Sun 2022 <sup>[99]</sup>     | Israel/Asia           | C57BL/6 mice/male             | Post NASH       | Fat accumulation、Inflammation、Other (Apoptosis)             |
| Sun 2019 <sup>[46]</sup>     | China/Asia            |                               |                 | Fat accumulation                                            |
| Wang G 2020 <sup>[100]</sup> | China/Asia            |                               |                 | Fat accumulation、Inflammation                               |
| Wang L 2020 <sup>[29]</sup>  | China/Asia            | C57BL/6 mice/male             | NAFLD induction | Fat accumulation                                            |
| Wang L 2016 <sup>[81]</sup>  | China/Asia            | C57BL/6J mice/Unclear         | Post NAFLD      | Fat accumulation                                            |
| Wang X 2019 <sup>[65]</sup>  | China/Asia            | C57BL/6J mice/male            | Post NAFLD      | Fat accumulation、Inflammation                               |
| Wang Y 2017 <sup>[105]</sup> | China/Asia            | C57BL/6 mice/male             | NAFLD induction | Fat accumulation                                            |
| Wu 2016 <sup>[66]</sup>      | America/North America | C57BL/6 mice/male             | Post NAFLD      | Fat accumulation                                            |
| Xu 2018 <sup>[107]</sup>     | China/Asia            | C57BL/6 mice/male             | Post NAFLD      | Fat accumulation、Insulin resistance                         |
| Xu 2021 <sup>[31]</sup>      | America/North America | C57BL/6J mice/male            | NAFLD induction | Fat accumulation 、Inflammation 、Fibrosis 、Other (Apoptosis) |
| Yu 2022 <sup>[110]</sup>     | China/Asia            | C57BL/6 mice/male             | Post NAFLD      | Inflammation、Oxidative stress                               |
| Zhang B 2019 <sup>[32]</sup> | China/Asia            | C57BL/6、ob/ob、db/db mice/male | Post NAFLD      | Fat accumulation、Insulin resistance                         |
| Zhang Q 2021 <sup>[45]</sup> | China/Asia            | C57BL/6、miR-125b KO mice/male | Post NAFLD      | Inflammation                                                |

|                               |                       |                               |                 |                                                                          |
|-------------------------------|-----------------------|-------------------------------|-----------------|--------------------------------------------------------------------------|
| Zhang T 2018 <sup>[112]</sup> | America/North America | C57BL/6 mice/male             | Post NAFLD      | Fat accumulation                                                         |
| Zhuge 2017 <sup>[49]</sup>    | China/Asia            | C57BL/6J、miR-150 KO mice/male | NAFLD induction | Fat accumulation、Insulin resistance                                      |
| Zuo 2021 <sup>[114]</sup>     | China/Asia            | C57BL/6N mice/male            | Post NAFLD      | Other (Endothelial Barrier Integrity)                                    |
| Ao 2016 <sup>[35]</sup>       | China/Asia            |                               |                 | Fat accumulation                                                         |
| Chen X 2021 <sup>[83]</sup>   | China/Asia            |                               |                 | Fat accumulation                                                         |
| Li B 2014 <sup>[55]</sup>     | China/Asia            |                               |                 | Fat accumulation、Oxidative stress                                        |
| Wang J 2019 <sup>[101]</sup>  | China/Asia            |                               |                 | Fat accumulation                                                         |
| Xiao 2016 <sup>[78]</sup>     | China/Asia            |                               |                 | Other (Lipogenesis)                                                      |
| Yang 2021 <sup>[108]</sup>    | China/Asia            |                               |                 | Fat accumulation、Inflammation                                            |
| Zhang Q 2020 <sup>[111]</sup> | China/Asia            |                               |                 | Fat accumulation                                                         |
| Li Y 2022 <sup>[56]</sup>     | China/Asia            |                               |                 | Fat accumulation                                                         |
| Liu H 2021 <sup>[36]</sup>    | China/Asia            | C57BL/6J mice/male            | Post NAFLD      | Fat accumulation、Inflammation                                            |
| Wang Y 2020 <sup>[57]</sup>   | China/Asia            | C57BL/6 mice/Unclear          | Post NAFLD      | Fat accumulation、Fibrosis、Other (Intestinal mucosal barrier dysfunction) |

|                              |                       |                           |            |                                                |
|------------------------------|-----------------------|---------------------------|------------|------------------------------------------------|
| Xiao J 2016 <sup>[59]</sup>  | China/Asia            |                           |            | Other (Lipogenesis)                            |
| Kong 2022 <sup>[89]</sup>    | China/Asia            |                           |            | Fat accumulation、Inflammation、Other (Necrosis) |
| Wang L 2022 <sup>[102]</sup> | China/Asia            |                           |            | Fat accumulation、Inflammation                  |
| miRNA-replacement therapy    |                       |                           |            |                                                |
| Chai 2020 <sup>[70]</sup>    | Israel/Asia           | C57BL/6 mice/male         | Post NAFLD | Oxidative stress、Other (Lipogenesis)           |
| Chen 2019 <sup>[73]</sup>    | China/Asia            |                           |            | Fat accumulation                               |
| Chen Z 2020 <sup>[77]</sup>  | China/Asia            | C57BL/6 mice/male         | Post NAFLD | Inflammation、Other (Apoptosis)                 |
| Cheng 2017 <sup>[54]</sup>   | China/Asia            | C57BL/6J mice/male        | Post NAFLD | Fat accumulation、Other (Lipogenesis)           |
| Dong 2022 <sup>[85]</sup>    | China/Asia            | C57BL/6J、db/db mice/male  | Post NAFLD | Other (Lipotoxicity)                           |
| Fan 2017 <sup>[44]</sup>     | China/Asia            | C57BL/6Ks、db/db mice/male | Post NAFLD | Fat accumulation                               |
| Fan 2021 <sup>[86]</sup>     | China/Asia            | HFHFr、db/db mice/Unclear  | Post NAFLD | Other (Glucolipid metabolism)                  |
| He 2017 <sup>[38]</sup>      | China/Asia            | C57BL/6 mice/male         | Post NAFLD | Fat accumulation、Inflammation                  |
| He 2018 <sup>[74]</sup>      | China/Asia            | C57BL/6 mice/female       | Post NASH  | Fat accumulation、Inflammation                  |
| He 2019 <sup>[60]</sup>      | America/North America |                           |            | Inflammation、Fibrosis、Oxidative stress         |

|                             |            |                                    |                 |                                                                |
|-----------------------------|------------|------------------------------------|-----------------|----------------------------------------------------------------|
| Hu 2019 <sup>[88]</sup>     | China/Asia | C57BL/6 mice/male                  |                 | Fat accumulation                                               |
| Hur 2015 <sup>[62]</sup>    | China/Asia |                                    |                 | Inflammation                                                   |
| Guo 2017 <sup>[58]</sup>    | China/Asia | C57BL/6J mice/male                 | Post NAFLD      | Fat accumulation                                               |
| Li D 2015 <sup>[92]</sup>   | China/Asia |                                    |                 | Inflammation                                                   |
| Li H 2021 <sup>[93]</sup>   | China/Asia | C57BL/6、miR-23b KO、db/db mice/male | Post NAFLD      | Fat accumulation 、 Inflammation 、 Fibrosis 、 Other (Apoptosis) |
| Li K 2020 <sup>[75]</sup>   | China/Asia | C57BL/6 mice/male                  | Post NAFLD      | Other (Glucolipid metabolism)                                  |
| Li P 2020 <sup>[94]</sup>   | China/Asia |                                    |                 | Oxidative stress、Fibrosis、Other (Glucolipid metabolism)        |
| Lin 2019 <sup>[42]</sup>    | China/Asia | C57BL/6J、miR-29a TG mice/male      | NAFLD induction | Fat accumulation、Fibrosis                                      |
| Lin 2017 <sup>[52]</sup>    | China/Asia |                                    |                 | Fat accumulation、Other (Glucolipid metabolism)                 |
| Liu 2019 <sup>[23]</sup>    | China/Asia |                                    |                 | Fat accumulation、Other (Lipogenesis)                           |
| Mittal 2020 <sup>[96]</sup> | India/Asia |                                    |                 | Fat accumulation                                               |
| Murata 2019 <sup>[40]</sup> | Japan/Asia |                                    |                 | Fat accumulation                                               |
| Niu 2022 <sup>[61]</sup>    | China/Asia | C57BL/6J mice/female               | NAFLD induction | Fat accumulation、Fibrosis                                      |

|                               |                       |                                    |                 |                                      |
|-------------------------------|-----------------------|------------------------------------|-----------------|--------------------------------------|
| Tang 2019 <sup>[63]</sup>     | China/Asia            |                                    |                 | Other (Autophagy)                    |
| Wang X 2020 <sup>[37]</sup>   | China/Asia            |                                    |                 | Fat accumulation                     |
| Wang X 2022 <sup>[104]</sup>  | China/Asia            | C57BL/6 mice/male                  | NAFLD induction | Fat accumulation                     |
| Wang Z 2020 <sup>[53]</sup>   | China/Asia            | C57BL/6、ob/ob、db/db mice/male      | NAFLD induction | Fat accumulation、Insulin resistance  |
| Wolfson 2018 <sup>[47]</sup>  | America/North America |                                    |                 | Inflammation                         |
| Wu 2017 <sup>[106]</sup>      | America/North America | C57BL/6 mice/male                  | Post NAFLD      | Fat accumulation、Insulin resistance  |
| Xu 2021 <sup>[39]</sup>       | China/Asia            | C57BL/6、miR-26a TG mice/male       | NAFLD induction | Fat accumulation、Oxidative stress    |
| Xu 2015 <sup>[31]</sup>       | America/North America | C57BL/6、ob/ob、db/db mice/male      | Post NAFLD      | Fat accumulation                     |
| Yang 2020 <sup>[119]</sup>    | China/Asia            | C57BL/6、miR-29a TG mice/male       | NASH induction  | Oxidative stress                     |
| Yu 2021 <sup>[109]</sup>      | China/Asia            | C57BL/6 mice/male                  | Post NAFLD      | Inflammation、Oxidative stress        |
| Zhang M 2017 <sup>[120]</sup> | China/Asia            | C57BL/6J mice/male、ob/ob mice/male | Post NAFLD      | Fat accumulation、Other (Lipogenesis) |
| Zhang M 2020 <sup>[69]</sup>  | China/Asia            | C57BL/6J mice/male、db/db mice      | Post NAFLD      | Fat accumulation                     |
| Zhang Z 2015 <sup>[121]</sup> | China/Asia            | C57BL/6J mice/female               | NAFLD induction | Fat accumulation、Other (Lipogenesis) |

|                               |            |                                                       |
|-------------------------------|------------|-------------------------------------------------------|
| Wang Y 2017 <sup>[22]</sup>   | China/Asia | Fibrosis、 Other （Apoptosis）                           |
| Zhao 2022 <sup>[34]</sup>     | China/Asia | Other （Oxidative phosphorylation）                     |
| Guo 2022 <sup>[25]</sup>      | China/Asia | Fat accumulation                                      |
| Li R 2022 <sup>[95]</sup>     | China/Asia | Fat accumulation                                      |
| Zhang N 2021 <sup>[48]</sup>  | China/Asia | Fat accumulation、 Inflammation、 Insulin resistance    |
| Zhang Y 2020 <sup>[113]</sup> | China/Asia | Fat accumulation、 Oxidative stress、 Other （Apoptosis） |
| Wang X 2018 <sup>[103]</sup>  | China/Asia | Fat accumulation、 Other （Lipogenesis）                 |

KO: Knockout; TG:Transgenic

NAFLD: Non-Alcoholic Fatty Liver Disease; NASH: Non-alcoholic steatohepatitis; HFD: High-fat diet; MCD: Methionine-choline deficient; HF-HC-HS: High fat-high cholesterol-high sugar-diet;
