# Supplementary material for: Therapeutic Effects of microRNAs on Nonalcoholic Fatty Liver Disease (NAFLD) and Nonalcoholic Steatohepatitis (NASH): A Systematic Review and Meta-Analysis
Source: MDPI journal article supplement (doi:10.3390/ijms24119168), 2023-05-23
Supplement: s1 [file s1]

Supplementary Table S1. Studies included in this systematic review

| Ref.                          | Type of study        | Cell line                         | Animal model                         | miRNA       | Intervention | Gene(s)/pathway regulated | Pharmacological effects                                                                |
|-------------------------------|----------------------|-----------------------------------|--------------------------------------|-------------|--------------|---------------------------|----------------------------------------------------------------------------------------|
| miRNA-inhibition therapy      |                      |                                   |                                      |             |              |                           |                                                                                        |
| Alshehri 2021 <sup>[26]</sup> | In vivo              |                                   | CdCl <sub>2</sub> -induced NAFLD     | miR-34a     | inhibitor    | SIRT1                     | Reduced hepatic fat accumulations in the livers                                        |
| Bala 2021 <sup>[79]</sup>     | In vivo              |                                   | HF-HC-HS induced NASH                | miR-155     | KO           | NLRP3                     | Decreased steatosis, and attenuation in fibrosis                                       |
| Chen 2020 <sup>[76]</sup>     | In vitro             | UA treated AML-12 and HepG2 cells |                                      | miR-149-5p  | inhibitor    | FGF21                     | Ameliorated the triglyceride accumulation                                              |
| Chen 2018 <sup>[82]</sup>     | In vivo and in vitro | FFA treated HepG2 cells and PH    | HFD induced NAFLD                    | miR-1224-5p | inhibitor    | AMPK $\alpha$             | Attenuated hepatic lipogenesis and steatosis                                           |
| Cheng 2016 <sup>[84]</sup>    | In vitro             | FFA treated Hepa 1-6 cells        |                                      | miR-421     | inhibitor    | SIRT3, FOXO3              | Decreased cellular oxidative damage                                                    |
| Chu 2022 <sup>[67]</sup>      | In vivo              |                                   | HFD induced NAFLD                    | miR-103a-3p | inhibitor    | HBP1                      | Decreased lipid accumulation, suppressed inflammatory response, reduced liver fibrosis |
| Csak 2015 <sup>[80]</sup>     | In vivo              |                                   | MCD induced NASH                     | miR-155     | KO           | SMAD3, C/EBP $\beta$      | Reduce steatosis and fibrosis                                                          |
| Dai 2019 <sup>[43]</sup>      | In vivo              |                                   | HFD induced NAFLD                    | miR-30b     | antimiR      | SERCA2b                   | Suppressed ER stress and insulin resistance                                            |
| Ding 2015 <sup>[27]</sup>     | In vivo and in vitro | FFA treated L-02 cells            | HFD induced NAFLD                    | miR-34a     | inhibitor    | PPAR $\alpha$ , SIRT1     | suppressed lipid accumulation and improved the degree of steatosis                     |
| Ding 2022 <sup>[68]</sup>     | In vivo and in vitro | FFA treated L-02 cells            | HFD induced NAFLD                    | miR-103-3p  | inhibitor    | ACOX1                     | alleviated the accumulation of lipid droplets                                          |
| Hanin 2018 <sup>[87]</sup>    | In vivo              |                                   | MCD, CDE, HFHS or CDHFD induced NASH | miR-132     | ASO          | AM132                     | reversed the hepatic miR-132 excess and hyperlipidemic phenotype                       |

|                                |                      |                                   |                          |            |           |                               |                                                                                       |
|--------------------------------|----------------------|-----------------------------------|--------------------------|------------|-----------|-------------------------------|---------------------------------------------------------------------------------------|
| Hu 2022 <sup>[71]</sup>        | In vivo and in vitro | PA treated L02 cells              | HFD induced NAFLD        | miR-122-5p | ASO       | FOXO3                         | Attenuated inflammatory response and oxidative stress damage in dietary-induced NAFLD |
| Lee A 2021 <sup>[28]</sup>     | In vitro             | FFA treated HepG2 cells           |                          | miR-34a-5p | inhibitor | NFE2L2                        | mediate cellular lipid accumulation                                                   |
| Lee D 2021 <sup>[90]</sup>     | In vivo              |                                   | HFD induced NAFLD        | miR-214-3p | antimiR   | Ulk1                          | Mitigated hepatic steatosis                                                           |
| Lee Y 2021 <sup>[19]</sup>     | In vivo and in vitro | PA treated HepG2 and hu-7 cells   | HFD or MCD induced NAFLD | miR-20b    | antimiR   | PPAR $\alpha$                 | Improved insulin sensitivity and a decrease in NAFLD progression                      |
| Lei 2018 <sup>[91]</sup>       | In vitro             | PA treated HepG2 cells            |                          | miR-375    | inhibitor | AdipoR2, TNF- $\alpha$ , IL-6 | Up-regulated the expression of Adiponectin and inhibited the lipid accumulation       |
| Liu 2020 <sup>[23]</sup>       | In vivo              |                                   | HFD induced NAFLD        | miR-130-5p | KO        | IGFBP2, AKT                   | Prevented hepatic lipid accumulation and insulin resistance                           |
| Liu 2020 <sup>[50]</sup>       | In vivo and in vitro | PO treated PH                     | HFD induced NAFLD        | miR-188    | antimiR   | Atg12                         | Alleviated diet-induced hepatosteatosis and insulin resistance                        |
| Long 2019 <sup>[72]</sup>      | In vitro             | FFA treated HepG2 and Huh-7 cells |                          | miR-122    | inhibitor | SIRT1, LKB1/AMPK              | Protected hepatocytes from lipid metabolic disorders                                  |
| Ng 2014 <sup>[97]</sup>        | In vivo and in vitro | OA treated HepG2 cells and PH     | HFD induced NAFLD        | miR-24     | ASO       | Insig1                        | Impaired hepatic lipid accumulation and reduced plasma triglycerides                  |
| Nie 2017 <sup>[98]</sup>       | In vivo and in vitro | PA treated HepG2 cells            | HFD induced NAFLD        | miR-194    | ASO       | FXR, Nr1                      | Attenuated structural disorders, lipid deposits and inflammatory response             |
| Riaz 2021 <sup>[51]</sup>      | In vivo and in vitro | LX-2 cells                        | HFD induced NAFLD        | miR-188-5p | inhibitor | PTEN/AKT                      | Suppressed the HF parameters, pro-fibrotic and pro-inflammatory genes, and fibrosis   |
| Rodrigues 2017 <sup>[64]</sup> | In vivo              |                                   | MCD induced NASH         | miR-21     | KO        | PPAR $\alpha$ , FXR           | Decreased steatosis, inflammation and lipoapoptosis, with impairment of fibrosis      |
| Simino 2021 <sup>[33]</sup>    | In vitro             | NEFA induced AML-12 cells         |                          | Let-7a     | antimiR   | AMPK $\alpha$ 2               | reduce fat accumulation                                                               |

|                               |                      |                                        |                           |            |           |                             |                                                                               |
|-------------------------------|----------------------|----------------------------------------|---------------------------|------------|-----------|-----------------------------|-------------------------------------------------------------------------------|
| Sun 2022 <sup>[99]</sup>      | In vivo and in vitro | PA induced PH                          | AMLN induced NASH         | miR-802    | ASO       | AMPK                        | Ameliorated steatosis, inflammation, apoptosis                                |
| Sun 2019 <sup>[46]</sup>      | In vitro             | FFA induced HepG2 cells                |                           | miR-140    | Knockdown | Neat1                       | Alleviated the severity of NAFLD                                              |
| Wang G 2020 <sup>[100]</sup>  | In vitro             | HFD mice isolated PH                   |                           | miR-124-3p | inhibitor | Pref-1                      | Reduced triglyceride contents in hepatocytes and inflammatory factors         |
| Wang L 2020 <sup>[29]</sup>   | In vivo and in vitro | OA and excess iron-treated HepG2 cells | Excess iron-induced NAFLD | miR-34a    | antimiR   | SIRT1                       | Alleviated triglyceride accumulation                                          |
| Wang L 2016 <sup>[81]</sup>   | In vivo              |                                        | HFD induced NAFLD         | miR-155    | inhibitor | LXR $\alpha$                | Decreased intracellular lipid content                                         |
| Wang X 2019 <sup>[65]</sup>   | In vivo              |                                        | MCD induced NAFLD         | miR-21     | antagomiR | LRP6, WNT/ $\beta$ -catenin | Alleviated lipid accumulation and inflammation                                |
| Wang Y 2017 <sup>[105]</sup>  | In vivo and in vitro | PA treated HepG2 cells                 | HFD induced NAFLD         | miR-181b   | inhibitor | SIRT1                       | Alleviated hepatic steatosis                                                  |
| Wu 2016 <sup>[66]</sup>       | In vivo and in vitro | OA treated HepG2 cells                 | HFD induced NAFLD         | miR-21     | ASO       | HBP1-P53-Srebp1c            | Reduced expression of genes controlling lipogenesis and cell cycle transition |
| Xu 2018 <sup>[107]</sup>      | In vivo and in vitro | FFA treated L-02 cells                 | HFD induced NAFLD         | miR-190b   | inhibitor | IGF-1, ADAMTS9              | Suppressed lipid accumulation and improved insulin sensitivity                |
| Xu 2021 <sup>[31]</sup>       | In vivo and in vitro | Kupffer cell                           | HFCF induced NASH         | miR-34a    | inhibitor | Cyp7a1, Cyp8b1, FAO         | Reversed HFCF diet-induced steatohepatitis                                    |
| Yu 2022 <sup>[110]</sup>      | In vivo and in vitro | FFA treated PH                         | HFD induced NAFLD         | miR-665-3p | antagomiR | FNDC5/AMPK $\alpha$         | Prevented oxidative stress, inflammation and hepatic dysfunction              |
| Zhang B 2019 <sup>[32]</sup>  | In vivo and in vitro | AML12                                  | HFD induced NAFLD         | miR-34a-5p | inhibitor | Mirt2, USP10                | Attenuated hyperglycemia, insulin resistance and steatosis                    |
| Zhang Q 2021 <sup>[45]</sup>  | In vivo and in vitro | FFA treated HepG2 cells                | HFD induced NAFLD         | miR-125b   | inhibitor | TNFAIP3, NF- $\kappa$ b     | Ameliorated liver damage and inflammatory responses                           |
| Zhang T 2018 <sup>[112]</sup> | In vivo and in vitro | OA treated HepG2 cells                 | HFD induced NAFLD         | miR-378    | ASO       | Nrf1                        | Improved FAO and decreased hepatosteatosis                                    |

|                               |                      |                               |                          |             |           |                        |                                                                                           |
|-------------------------------|----------------------|-------------------------------|--------------------------|-------------|-----------|------------------------|-------------------------------------------------------------------------------------------|
| Zhuge 2017 <sup>[49]</sup>    | In vivo              |                               | HFD induced NAFLD        | miR-150     | KO        | CFLAR                  | Regulated hepatic steatosis and insulin resistance                                        |
| Zuo 2021 <sup>[114]</sup>     | In vivo and in vitro | PA treated HepG2 cells        | MCD or HFD induced NAFLD | miR-7       | inhibitor | LAMP1/CathepsinB/NLRP3 | Improved endothelial barrier integrity                                                    |
| Ao 2016 <sup>[35]</sup>       | In vitro             | OA treated L-02 cells         |                          | miR-9       | inhibitor | Onecut2, SIRT1         | Decreased intracellular lipid content                                                     |
| Chen X 2021 <sup>[83]</sup>   | In vitro             | FFA treated L-02 cells        |                          | miR-380-5p  | inhibitor | LRP2                   | Reduced lipid formation and accumulation                                                  |
| Li B 2014 <sup>[55]</sup>     | In vitro             | FFA treated HepG2/AML12 cells |                          | miR-199a-5p | antimiR   | CAV1, PPAR $\alpha$    | Alleviated deposition of FA and increased ATP levels and mtDNA contents                   |
| Wang J 2019 <sup>[101]</sup>  | In vitro             | FFA treated L-02 cells        |                          | miR-222     | antagomiR | ACOX1                  | Inhibited the accumulation of triglyceride                                                |
| Xiao 2016 <sup>[78]</sup>     | In vitro             | FFA treated HepG2 cells       |                          | miR-149     | inhibitor | FGF21                  | Decreased lipogenesis                                                                     |
| Yang 2021 <sup>[108]</sup>    | In vitro             | FFA treated L-02 cells        |                          | miR-22      | inhibitor | Sirt1                  | Reduced triglyceride levels without affecting cell activity                               |
| Zhang Q 2020 <sup>[111]</sup> | In vitro             | SA or PA treated AML12 cells  |                          | miR-295-5p  | inhibitor | CAV1                   | Decreased hepatic lipid accumulation                                                      |
| Li Y 2022 <sup>[56]</sup>     | In vitro             | FFA treated HepG2 cells       |                          | miR-200c    | inhibitor | SIK2/PI3K/Akt          | Decreased lipid accumulation                                                              |
| Liu H 2021 <sup>[36]</sup>    | In vivo and in vitro | PA treated L-02 cells         | HFD induced NAFLD        | miR-9-5p    | antimiR   | TGM2                   | Alleviated macrophage inflammation and M1 polarization and attenuated pathological change |
| Wang Y 2020 <sup>[57]</sup>   | In vivo              |                               | HFD induced NAFLD        | miR-200     | inhibitor | GRHL2, SIRT1, MAPK     | Inhibited liver fibrosis and intestinal mucosal barrier dysfunction                       |
| Xiao J 2016 <sup>[59]</sup>   | In vitro             | FFA treated HepG2 cells       |                          | miR-212     | inhibitor | FGF21                  | Inhibited lipogenesis                                                                     |
| Kong 2022 <sup>[89]</sup>     | In vitro             | PA treated Hepa1-6 cells      |                          | mmu-miR-599 | inhibitor | PXR                    | Inhibited steatosis, focal necrosis and inflammatory infiltration                         |
| Wang L 2022 <sup>[102]</sup>  | In vitro             | PA treated L-02 cells         |                          | miR-138-5p  | antimiR   | PGC-1 $\alpha$         | promoted lipid metabolism and inhibited inflammatory response                             |

| miRNA-replacement therapy   |                      |                                    |                          |             |             |                      |                                                                                           |
|-----------------------------|----------------------|------------------------------------|--------------------------|-------------|-------------|----------------------|-------------------------------------------------------------------------------------------|
| Chai 2020 <sup>[70]</sup>   | In vivo              |                                    | HFD induced NAFLD        | miR-122     | agomiR      | RORA                 | Decreased fat droplets and total triglyceride content                                     |
| Chen 2019 <sup>[73]</sup>   | In vitro             | FFA treated HepG2 cells            |                          | miR-146a-5p | mimic       | ROCK1                | Inhibited lipid accumulation                                                              |
| Chen Z 2020 <sup>[77]</sup> | In vivo and in vitro | HFD mice isolated liver cells      | HFD induced NAFLD        | miR-149     | agomiR      | ATF6                 | Alleviated ERS-induced inflammation and apoptosis                                         |
| Cheng 2017 <sup>[54]</sup>  | In vivo and in vitro | FFA treated Hepa 1-6 cells         | HFD induced NAFLD        | miR-199a-3p | mimic       | Sp1                  | Suppressed hepatic lipogenesis                                                            |
| Dong 2022 <sup>[85]</sup>   | In vivo and in vitro | PA treated PH and Huh7 cells       | HFHC induced NAFLD       | miR-379-5p  | mimic       | STAT1, HMGCS1        | Reduced total cholesterol and free cholesterol and ameliorated hepatic injury reflected   |
| Fan 2017 <sup>[44]</sup>    | In vivo and in vitro | PA treated HepG2 cells             | db/db mice induced NAFLD | miR-30c-5p  | mimic       | FASN                 | Attenuated triglyceride accumulation and hepatic steatosis                                |
| Fan 2021 <sup>[86]</sup>    | In vivo and in vitro | FFA treated HepG2 cells            | HFHFr induced NAFLD      | miR-552-3p  | mimic       | LXR $\alpha$ , FXR   | Inhibited metabolic gene expression in vitro and improved glycolipid metabolism           |
| He 2017 <sup>[38]</sup>     | In vivo and in vitro | CD4 T cells                        | HFD induced NAFLD        | miR-26a     | pre-miR-26a | IL-6, IL-17          | Decreased total liver weight, hepatic triglyceride deposition and serum ALT concentration |
| He 2018 <sup>[74]</sup>     | In vivo and in vitro | PA treated Hep G2 and AML-12 cells | MCD induced NASH         | miR-146b    | mimic       | MyD88, PPAR $\gamma$ | alleviate the hepatic steatosis                                                           |
| He 2019 <sup>[60]</sup>     | In vitro             | PA treated AML-12 cells            |                          | miR-223     | mimic       | Cxcl10, Tar          | Controlled steatosis-to-NASH progression                                                  |
| Hu 2019 <sup>[88]</sup>     | In vivo and in vitro | OA treated HepG2 and PH cells      | HFD induced NAFLD        | miR-205     | mimic       | NEU1                 | Suppressed lipid accumulation                                                             |
| Hur 2015 <sup>[62]</sup>    | In vitro             | PA treated HepG2 cells             |                          | miR-451     | mimic       | Cab39,AMPK/AKT       | Prevented the progression from simple steatosis to severely advanced liver disease        |

|                              |                      |                                    |                           |             |                          |                      |                                                                                 |
|------------------------------|----------------------|------------------------------------|---------------------------|-------------|--------------------------|----------------------|---------------------------------------------------------------------------------|
| Guo 2017 <sup>[58]</sup>     | In vivo and in vitro | Oleatic sodium treated PH          | HFD induced NAFLD         | miR-212-5p  | mimic                    | FAS, SCD1            | Decreased triglyceride accumulation                                             |
| Li D 2015 <sup>[92]</sup>    | In vitro             | Kupffer cells and BMM              |                           | miR-144     | mimic                    | TLR2                 | Decreased proinflammatory cytokine production                                   |
| Li H 2021 <sup>[93]</sup>    | In vivo              |                                    | HFD induced NAFLD         | miR-23b     | agomiR                   | Acot4, ACC           | Reduced liver weight and alleviated liver inflammation, apoptosis, and fibrosis |
| Li K 2020 <sup>[75]</sup>    | In vivo and in vitro | FFA treated AML-12 cells           | HFD induced NAFLD         | miR-146a    | mimic                    | MED1                 | Improved lipid metabolism and mitochondrial function                            |
| Li P 2020 <sup>[94]</sup>    | In vitro             | PA treated L-02 cells              |                           | miR-99a     | mimic                    | NOX4                 | Reversed the pathological changes of liver                                      |
| Lin 2019 <sup>[42]</sup>     | In vivo and in vitro | HepG2 cells                        | HFD induced NAFLD         | miR-29a     | transgene mice and mimic | PPAR $\gamma$ , CD36 | Improved HDF-induced obesity, hepatocellular steatosis, and fibrosis            |
| Lin 2017 <sup>[52]</sup>     | In vitro             | Bisphenol A treated HepG2 cells    |                           | miR-192     | mimic                    | SREBF1               | Improved BPA-induced hepatic steatosis                                          |
| Liu 2019 <sup>[23]</sup>     | In vitro             | FFA treated HepG2 and Huh-7 cells  |                           | miR-130     | mimic                    | PPAR $\gamma$ , CD36 | Inhibited lipogenesis and TG secretion                                          |
| Mittal 2020 <sup>[96]</sup>  | In vitro             | PA treated HepG2 cells             |                           | miR-3666    | overexpression           | PPAR $\gamma$        | Decreased hepatic steatosis                                                     |
| Murata 2019 <sup>[40]</sup>  | In vitro             | 3T3-L1 cells                       |                           | miR-27b     | mimic                    | ACT2                 | Suppressed lipid accumulation and adipocyte differentiation                     |
| Niu 2022 <sup>[61]</sup>     | In vivo and in vitro | PA treated NCTC1469 cells          | HFD induced NAFLD         | miR-223-3p  | mimic                    | E2F1                 | Suppressed lipid accumulation and liver fibrosis                                |
| Tang 2019 <sup>[63]</sup>    | In vitro             | HFD mice isolated PH               |                           | miR-451     | mimic                    | MIF, AKT             | Suppressed Akt and promoted autophagy                                           |
| Wang X 2020 <sup>[37]</sup>  | In vitro             | FFA treated HepG2 cells and PH     |                           | miR-20a-5p  | mimic                    | CD36                 | Reduced lipid accumulation                                                      |
| Wang X 2022 <sup>[104]</sup> | In vivo and in vitro | FFA treated HepG2 and AML-12 cells | HFD induced NAFLD         | miR-376b-3p | mimic                    | FGFR1                | Ameliorated hepatic lipid accumulation                                          |
| Wang Z 2020 <sup>[53]</sup>  | In vivo              |                                    | HFD or HFrD induced NAFLD | miR-192-3p  | overexpression           | NR3C1                | Controlled fat accumulation and insulin sensitivity in liver                    |

|                               |                      |                                  |                   |             |                |                          |                                                                                                 |
|-------------------------------|----------------------|----------------------------------|-------------------|-------------|----------------|--------------------------|-------------------------------------------------------------------------------------------------|
| Wolfson 2018 <sup>[47]</sup>  | In vitro             | PA treated HepG2cells            |                   | miR-140     | overexpression | TLR4/NFκB                | Decreased inflammatory activity                                                                 |
| Wu 2017 <sup>[106]</sup>      | In vivo and in vitro | FFA treated HepG2 cells and PH   | HFD induced NAFLD | miR-206     | mimic          | Ptpn1                    | Facilitated insulin signaling and impairing hepatic lipogenesis                                 |
| Xu 2021 <sup>[39]</sup>       | In vivo and in vitro | FFA treated HepG2 cells and PH   | HFD induced NAFLD | miR-26a     | overexpression | ER, EIF2α                | Mitigated high-fat diet-induced ER stress and hepatic steatosis                                 |
| Xu 2015 <sup>[31]</sup>       | In vivo and in vitro | FFA treated HepG2 cells and PH   | HFD induced NAFLD | miR-34a     | mimic          | HNF-4α                   | Inhibited very low-density lipoprotein secretion and promotes liver steatosis and hypolipidemia |
| Yang 2020 <sup>[119]</sup>    | In vivo and in vitro | HepG2 cells                      | MCD induced NASH  | miR-29a     | mimic          | GSK3β, SIRT1             | Inhibited mitochondrial biogenesis and alleviated proteostatic stress and UPRmt                 |
| Yu 2021 <sup>[109]</sup>      | In vivo and in vitro | FFA treated PH                   | HFD induced NAFLD | miR-137-3p  | agomiR         | AMPKα                    | Alleviated oxidative stress, inflammation, and hepatic dysfunction                              |
| Zhang M 2017 <sup>[120]</sup> | In vivo and in vitro | OA treated PH                    | HFD induced NAFLD | miR-27a     | mimic          | Fasn, Scd1               | Reduced liver TG contents                                                                       |
| Zhang M 2020 <sup>[69]</sup>  | In vivo and in vitro | OA treated PH                    | HCD induced NAFLD | miR-103     | overexpression | Fasn, Scd1               | Inhibited hepatic DNL to repress HCD-promoted hepatic lipid contents                            |
| Zhang Z 2015 <sup>[121]</sup> | In vivo and in vitro | FFA treated HepG2 cells and PH   | HFD induced NAFLD | miR-125b    | mimic          | FAS, Estrogen            | Inhibited liver steatosis                                                                       |
| Wang Y 2017 <sup>[22]</sup>   | In vitro             | HSC-T6                           |                   | miR-130a-3p | mimic          | TGF-β/SMAD, TGFB1, TGFB2 | Attenuated activation and induced apoptosis of hepatic stellate cells                           |
| Zhao 2022 <sup>[34]</sup>     | In vitro             | PA treated PH                    |                   | Let-7b-5p   | mimic          | TGF-β                    | Reduced mitochondrial oxidative phosphorylation and suppressed white-to-beige fat conversion    |
| Guo 2022 <sup>[25]</sup>      | In vitro             | FFA treated HepG2 cells          |                   | miR-130b-3p | mimic          | RCOK1, HOTAIR            | Decreased lipid accumulation                                                                    |
| Li R 2022 <sup>[95]</sup>     | In vitro             | HG and FFA treated Hepa1-6 cells |                   | miR-5120    | mimic          | ABHD6                    | Improved liver function and hepatic steatosis                                                   |

|                               |          |                          |           |        |            |                                                  |
|-------------------------------|----------|--------------------------|-----------|--------|------------|--------------------------------------------------|
| Zhang N 2021 <sup>[48]</sup>  | In vitro | FFA treated AML-12 cells | miR-150   | mimic  | CXCR4      | Mitigated HFD-induced NAFLD                      |
| Zhang Y 2020 <sup>[113]</sup> | In vitro | PA treated HepG2 cells   | miR-96-5p | agomiR | P66shc     | Alleviated ROS, apoptosis and hepatic steatosis  |
| Wang X 2018 <sup>[103]</sup>  | In vitro | FFA treated AML-12 cells | miR-136   | mimic  | MEG3, Nrf1 | Decreased serum lipid level and alleviated NAFLD |

OA: Oleic acid; UA: Urine acid; SA: Stearic acid; PA: Palmitic acid; FFA: Free fat acid; PH: Primary hepatocytes; NAFLD: Non-Alcoholic Fatty Liver Disease; NASH: Non-alcoholic steatohepatitis; HFD: High-fat diet; MCD: Methionine-choline deficient; HF-HC-HS: High fat-high cholesterol-high sugar-diet; HFHS: High-fat-high-sucrose; CDHFD: Choline-deficient high fat diet; HFHC: High-fat and high-cholesterol; HFHFr: High-fat and high-fructose; HFCF: high fat, cholesterol, and fructose; CDE: Choline-deficient, ethionine-supplemented; AMLN: Amylin liver NASH;  
 KO: Knockout; ASO: Antisense oligonucleotides; NEFA: Non-esterified fatty-acids
